# Supplementary material for: Tele-Monitoring of Cancer Patients’ Rhythms during Daily Life Identifies Actionable Determinants of Circadian and Sleep Disruption
Source: PubMed Central journal article supplement (PMC7409071; doi:10.3390/cancers12071938), 2020-07-17
Supplement: cancers-12-01938-s001.pdf [file cancers-12-01938-s001.pdf]

Article

# Tele-Monitoring of Cancer Patients' Rhythms during Daily Life Identifies Actionable Determinants of Circadian and Sleep Disruption.

Francis Lévi <sup>1,2,3,\*</sup>, Sandra Komarzynski <sup>1,2</sup>, Qi Huang <sup>1,4</sup>, Teresa Young <sup>5</sup>, Yeng Ang <sup>6,7</sup>,  
Claire Fuller <sup>8</sup>, Matei Bolborea <sup>1</sup>, Julia Brettschneider <sup>4</sup>, Joanna Fursse <sup>1</sup>, Bärbel Finkenstädt <sup>2,4</sup>,  
David Pollard White <sup>9,10</sup> and Pasquale Innominato <sup>1,2,8</sup>

- <sup>1</sup> Cancer Chronotherapy Team, Warwick Medical School, Coventry CV4 7AL, UK; S.Komarzynski@warwick.ac.uk (S.K.); Q.Huang.6@warwick.ac.uk (Q.H.); M.Bolborea@warwick.ac.uk (M.B.); Joanna.fursse@nhs.net (J.F.); Pasquale.Innominato@wales.nhs.uk (P.I.)
  - <sup>2</sup> European Laboratory U935, Institut National de la Santé et de la Recherche Médicale (INSERM), and Paris-Saclay University, Villejuif 94801, France; B.F.Finkenstadt@warwick.ac.uk
  - <sup>3</sup> Hepato-biliary Centre, Paul Brousse Hospital, Assistance Publique Hôpitaux de Paris (AP-HP), Villejuif 94800, France
  - <sup>4</sup> Department of Statistics, University of Warwick, Coventry CV4 7AL, UK; Julia.Brettschneider@warwick.ac.uk
  - <sup>5</sup> Mount Vernon Cancer Centre, East and North Hertfordshire NHS Trust, Northwood, Middlesex HA6 2RN, UK; Teresa.young2@nhs.net
  - <sup>6</sup> Salford Royal NHS Foundation Trust, Salford M6 8HD, UK; Yeng.Ang@srft.nhs.uk
  - <sup>7</sup> Gastrointestinal Sciences, Division of Diabetes, Endocrinology and Gastroenterology, Faculty of Biology, Medicine and Health, University of Manchester, Manchester M13 9PL, UK
  - <sup>8</sup> North Wales Cancer Treatment Centre, Ysbyty Gwynedd, Betsi Cadwaladr University Health Board, Bangor LL57 2PW, UK; Claire.Fuller2@wales.nhs.uk
  - <sup>9</sup> Division of Sleep and Circadian Disorders, Brigham and Women's Hospital, Harvard Medical School, Boston, MA 02130, USA; dpwhite@partners.org
  - <sup>10</sup> Philips Respironics, Murrysville, PA 15668, USA
- \* Correspondence: F.Levi@warwick.ac.uk; Tel.: +44-2476-575-132

## Supplementary

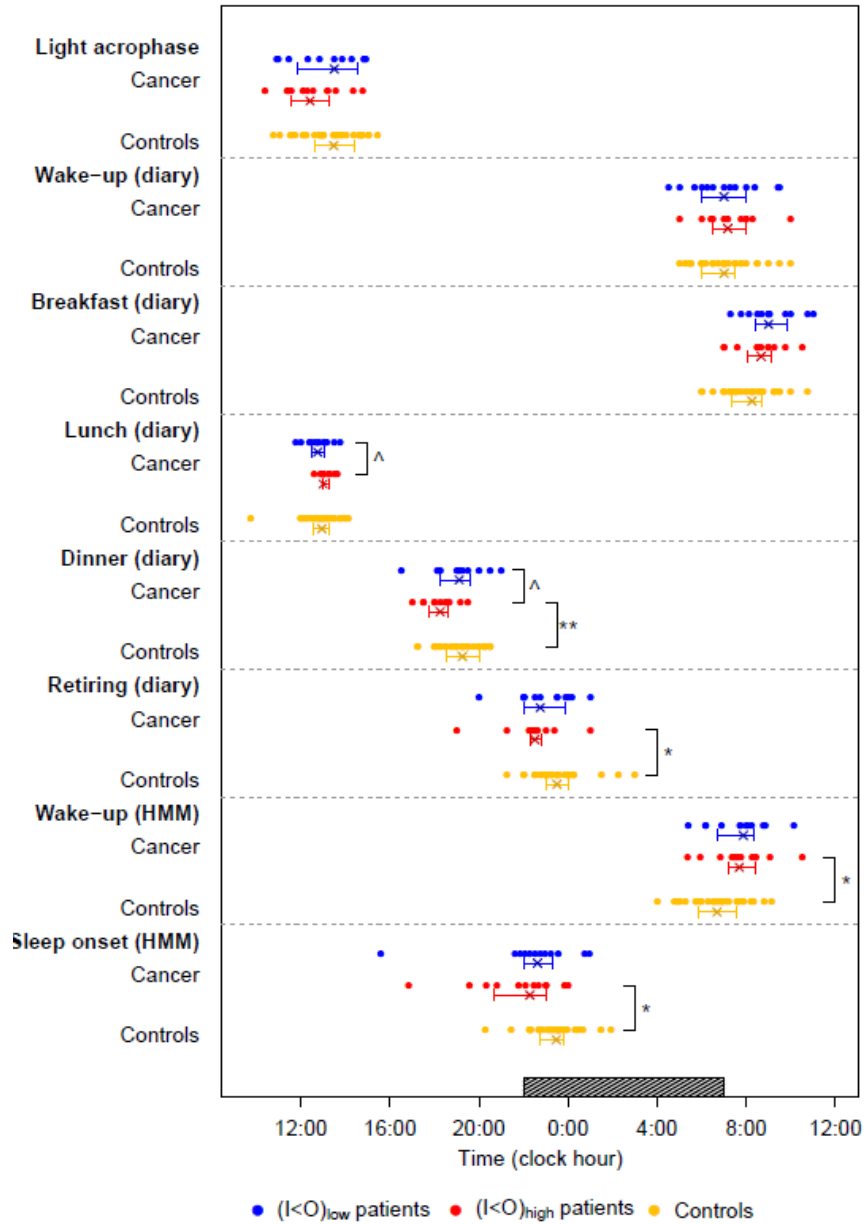

**Figure S1.** Environmental synchronizing signals. Median, interquartiles, and individual median timings of each environmental signal according to either I < O cancer group (11 to 13 participants for each signal) or control group (31 to 33 participants).

**Table S1.** Sex or age effects on the rest-activity and chest surface temperature circadian parameters, synchronization signals, cortisol rhythm, and DLMO in the controls. When not specified the data are presented as Number of subjects (%).

|                                                      | Age < 40 years       | Age ≥ 40 years       | Male                 | Female               |
|------------------------------------------------------|----------------------|----------------------|----------------------|----------------------|
| <b>Rest-activity circadian rhythm</b>                | <b>N=18</b>          | <b>N=15</b>          | <b>N=15</b>          | <b>N=18</b>          |
| <i>I&lt;O over study week (%)</i>                    |                      | p=0.01*              |                      | p=0.98               |
| Median [Q1, Q3]                                      | 99.7 [98.9, 100.0]   | 98.3 [97.5, 99.4]    | 99.2 [98.4, 99.8]    | 99.1 [98.4, 99.8]    |
| Range                                                | 98.0 - 100.0         | 95.0 - 100.0         | 95.0 - 100.0         | 95.5 - 100.0         |
| <i>Median of moderate-to-high activity (acc/min)</i> |                      | p=0.22               |                      | p=0.41               |
| Median [Q1, Q3]                                      | 172.7 [162.5, 185.8] | 185.3 [172.9, 199.6] | 174.7 [158.1, 194.4] | 178.6 [169.2, 190.9] |
| Range                                                | 132.5 - 208.5        | 142.7 - 210.0        | 132.5 - 208.5        | 149.7 - 210.0        |
| <i>Circadian amplitude (acc/min)</i>                 |                      | p=0.17               |                      | p=0.27               |
| Median [Q1, Q3]                                      | 61.1 [53.1, 69.1]    | 67.5 [63.0, 78.1]    | 62.5 [54.8, 80.1]    | 66.5 [54.6, 71.4]    |
| Range                                                | 39.3 - 105.2         | 39.5 - 101.5         | 45.6 - 105.2         | 39.3 - 82.2          |
| <i>Circadian acrophase (clock time)</i>              |                      | p=0.01*              |                      | p=0.71               |
| Median [Q1, Q3]                                      | 15:07 [14:11, 16:14] | 14:00 [12:29, 14:50] | 14:33 [12:48, 15:23] | 14:31 [13:57, 15:50] |
| Range                                                | 11:59 - 17:10        | 11:43 - 16:01        | 11:59 - 17:10        | 11:43 - 16:49        |
| <i>P1-1</i>                                          |                      | p=0.0009***          |                      | p=0.63               |
| Median [Q1, Q3]                                      | 0.97 [0.97, 0.98]    | 0.96 [0.94, 0.97]    | 0.97 [0.96, 0.98]    | 0.97 [0.96, 0.97]    |
| Range                                                | 0.96 - 0.99          | 0.93 - 0.98          | 0.94 - 0.99          | 0.93 - 0.98          |
| <i>r24</i>                                           |                      | p=0.30               |                      | p=0.39               |
| Median [Q1, Q3]                                      | 0.36 [0.30, 0.41]    | 0.39 [0.32, 0.45]    | 0.39 [0.29, 0.42]    | 0.34 [0.33, 0.44]    |
| Range                                                | 0.09 - 0.63          | 0.20 - 0.55          | 0.17 - 0.63          | 0.09 - 0.47          |
| <i>Rhythm Index</i>                                  |                      | p=0.23               |                      | p=0.21               |
| Median [Q1, Q3]                                      | 0.79 [0.74, 0.83]    | 0.74 [0.58, 0.80]    | 0.79 [0.74, 0.84]    | 0.77 [0.63, 0.81]    |
| Range                                                | 0.47 - 0.90          | 0.48 - 0.92          | 0.57 - 0.92          | 0.47 - 0.90          |
| <i>Rest duration (hours)</i>                         |                      | p=0.56               |                      | p=0.85               |
| Median [Q1, Q3]                                      | 8.0 [7.4, 8.8]       | 8.3 [7.5, 9.4]       | 8.1 [7.7, 8.9]       | 7.9 [7.3, 8.9]       |
| Range                                                | 7.1 - 12.4           | 5.3 - 12.9           | 6.8 - 12.9           | 5.3 - 12.4           |

|                                                   |                         |                         |                         |                         |
|---------------------------------------------------|-------------------------|-------------------------|-------------------------|-------------------------|
| <i>Center-of-rest time (clock time)</i>           |                         | p=0.01*                 |                         | p=0.96                  |
| Median [Q1, Q3]                                   | 03:22<br>[02:41, 03:47] | 02:20<br>[01:48, 03:08] | 03:00<br>[01:52, 03:22] | 03:08<br>[02:24, 03:29] |
| Range                                             | 01:20 - 06:25           | 01:10 - 03:50           | 01:10 - 06:25           | 01:20 - 05:20           |
| <b>Chest surface temperature circadian rhythm</b> | <b>N=9</b>              | <b>N=12</b>             | <b>N=10</b>             | <b>N=11</b>             |
| <i>Circadian amplitude (°C) - SR</i>              |                         | p=0.04*                 |                         | p=0.37                  |
| Median [Q1, Q3]                                   | 0.7 [0.5, 0.8]          | 1.1 [0.6, 1.3]          | 1.0 [0.7, 1.3]          | 0.7 [0.5, 0.9]          |
| Range                                             | 0.4 - 1.0               | 0.2 - 2.1               | 0.5 - 1.5               | 0.2 - 2.1               |
| <i>Circadian acrophase (clock time) - SR</i>      |                         | p=0.35                  |                         | p=0.07^                 |
| Median [Q1, Q3]                                   | 02:16<br>[00:59, 03:55] | 02:51<br>[01:45, 04:04] | 02:03<br>[00:27, 02:28] | 03:55<br>[02:33, 04:51] |
| Range                                             | 23:35 - 05:23           | 00:06 - 15:49           | 00:06 - 04:46           | 23:35 - 15:49           |
| <i>Physiologic chest surface temperature</i>      |                         | p=1                     |                         | p=1                     |
| Yes                                               | 9 (100)                 | 11 (91.7)               | 10 (100)                | 10 (90.9)               |
| No                                                | 0 (0)                   | 1 (8.3)                 | 0 (0)                   | 1 (9.1)                 |
| <i>Circadian mesor (°C) - cosinor</i>             |                         | p=0.58                  |                         | p=0.0002***             |
| Median [Q1, Q3]                                   | 34.9 [34.5, 35.3]       | 34.6 [34.2, 35.4]       | 34.5 [34.3, 34.6]       | 35.4 [34.9, 35.6]       |
| Range                                             | 34.1 - 36.0             | 33.8 - 36.4             | 34.0 - 35.2             | 33.8 - 36.4             |
| <i>Circadian amplitude (°C) - cosinor</i>         |                         | p=0.05*                 |                         | p=0.64                  |
| Median [Q1, Q3]                                   | 0.9 [0.7, 1.0]          | 1.2 [1.0, 1.4]          | 1.2 [0.9, 1.4]          | 1.0 [0.8, 1.1]          |
| Range                                             | 0.5 - 1.3               | 0.3 - 2.4               | 0.5 - 1.7               | 0.3 - 2.4               |
| <i>Circadian acrophase (clock time) - cosinor</i> |                         | p=0.17                  |                         | p=0.75                  |
| Median [Q1, Q3]                                   | 03:10<br>[02:25, 04:50] | 02:58<br>[02:17, 03:44] | 02:22<br>[02:13, 03:25] | 02:58<br>[02:17, 03:44] |
| Range                                             | 01:40 - 06:20           | 22:30 - 04:05           | 22:30 - 06:20           | 22:30 - 04:05           |
| <b>Synchronization signals</b>                    | <b>N=18</b>             | <b>N=15</b>             | <b>N=15</b>             | <b>N=18</b>             |
| <i>Light acrophase (clock time)</i>               |                         | p=0.56                  |                         | p=0.70                  |
| Median [Q1, Q3]                                   | 13:15<br>[12:23, 13:47] | 13:30<br>[12:44, 14:39] | 13:02<br>[12:45, 13:56] | 13:33<br>[12:23, 14:34] |
| Range                                             | 11:32 - 15:02           | 10:46 - 15:26           | 10:46 - 15:02           | 11:02 - 15:26           |

**Table S2.** Comparison of rest-activity and chest surface temperature circadian parameters, synchronization signals, cortisol rhythm and DLMO between the (I<O><sub>high</sub>) patients and the controls older than 40 years. When not specified the data are presented as Number of subjects (%).

|                                                      | Controls<br>Age ≥ 40 years<br>N=15 | Cancer patients<br>(I<O> <sub>high</sub> )<br>N=12 |
|------------------------------------------------------|------------------------------------|----------------------------------------------------|
| <b>Rest-activity circadian rhythm</b>                |                                    |                                                    |
| <i>I&lt;O over study week (%)</i>                    |                                    | p=0.15                                             |
| Median [Q1, Q3]                                      | 98.3 [97.5, 99.4]                  | 97.3 [96.5, 98.6]                                  |
| Range                                                | 95.0 - 100.0                       | 93.3 - 99.0                                        |
| <i>Median of moderate-to-high activity (acc/min)</i> |                                    | p<0.0001****                                       |
| Median [Q1, Q3]                                      | 185.3 [172.9, 199.6]               | 106.1 [86.6, 131.2]                                |
| Range                                                | 142.7 - 210.0                      | 47.8 - 169.2                                       |
| <i>Circadian amplitude (acc/min)</i>                 |                                    | p=0.37                                             |
| Median [Q1, Q3]                                      | 67.5 [63.0, 78.1]                  | 63.9 [59.9, 71.7]                                  |
| Range                                                | 39.5 - 101.5                       | 46.8 - 91.1                                        |
| <i>Circadian acrophase (clock time)</i>              |                                    | p=0.35                                             |
| Median [Q1, Q3]                                      | 14:00 [12:29, 14:50]               | 13:13 [12:13, 14:25]                               |
| Range                                                | 11:43 - 16:01                      | 10:20 - 16:36                                      |
| <i>P1-1</i>                                          |                                    | p=0.01*                                            |
| Median [Q1, Q3]                                      | 0.96 [0.94, 0.97]                  | 0.94 [0.93, 0.94]                                  |
| Range                                                | 0.93 - 0.98                        | 0.91 - 0.97                                        |
| <i>r24</i>                                           |                                    | p=0.54                                             |
| Median [Q1, Q3]                                      | 0.39 [0.32, 0.45]                  | 0.36 [0.33, 0.43]                                  |
| Range                                                | 0.20 - 0.55                        | 0.25 - 0.54                                        |
| <i>Rhythm Index</i>                                  |                                    | p=0.60                                             |
| Median [Q1, Q3]                                      | 0.74 [0.58, 0.80]                  | 0.70 [0.63, 0.76]                                  |
| Range                                                | 0.48 - 0.92                        | 0.54 - 0.79                                        |
| <i>Rest duration (hours)</i>                         |                                    | p=0.62                                             |
| Median [Q1, Q3]                                      | 8.3 [7.5, 9.4]                     | 8.4 [7.5, 10.7]                                    |
| Range                                                | 5.3 - 12.9                         | 6.4 - 12.6                                         |
| <i>Center-of-rest time (clock time)</i>              |                                    | p=0.16                                             |
| Median [Q1, Q3]                                      | 02:20 [01:48, 03:08]               | 03:05 [02:17, 03:50]                               |
| Range                                                | 01:10 - 03:50                      | 00:55 - 06:50                                      |
| <b>Chest surface temperature circadian rhythm</b>    |                                    |                                                    |
| <i>Circadian amplitude (°C) - SR</i>                 |                                    | p=0.18                                             |
| Median [Q1, Q3]                                      | 1.1 [0.6, 1.3]                     | 0.9 [0.6, 1.1]                                     |
| Range                                                | 0.2 - 2.1                          | 0.3 - 1.4                                          |
| <i>Circadian acrophase (clock time) - SR</i>         |                                    | p=0.20                                             |
| Median [Q1, Q3]                                      | 02:51 [01:45, 04:04]               | 01:33 [23:55, 03:09]                               |
| Range                                                | 00:06 - 15:49                      | 20:17 - 08:44                                      |
| <i>Physiologic chest surface temperature</i>         |                                    | p=0.59                                             |
| Yes                                                  | 11 (91.7)                          | 9 (81.8)                                           |
| No                                                   | 1 (8.3)                            | 2 (18.2)                                           |
| <i>Circadian mesor (°C) - cosinor</i>                |                                    | p=0.27                                             |
| Median [Q1, Q3]                                      | 34.6 [34.2, 35.4]                  | 35.1 [34.9, 35.4]                                  |
| Range                                                | 33.8 - 36.4                        | 33.9 - 35.9                                        |
| <i>Circadian amplitude (°C) - cosinor</i>            |                                    | p=0.12                                             |
| Median [Q1, Q3]                                      | 1.2 [1.0, 1.4]                     | 1.0 [0.7, 1.1]                                     |
| Range                                                | 0.3 - 2.4                          | 0.5 - 1.5                                          |
| <i>Circadian acrophase (clock time) - cosinor</i>    |                                    | p=0.40                                             |
| Median [Q1, Q3]                                      | 02:58 [02:17, 03:44]               | 03:10 [02:16, 04:03]                               |
| Range                                                | 22:30 - 04:05                      | 18:50 - 04:40                                      |
| <b>Synchronization signals</b>                       |                                    |                                                    |
| <i>Light acrophase (clock time)</i>                  |                                    | p=0.11                                             |
| Median [Q1, Q3]                                      | 13:30 [12:44, 14:39]               | 12:24 [11:32, 13:17]                               |
| Range                                                | 10:46 - 15:26                      | 10:23 - 14:46                                      |
| <i>Median wake-up time (clock time) - diary</i>      |                                    | p=0.06^                                            |
| Median [Q1, Q3]                                      | 06:10 [05:45, 07:00]               | 07:10 [06:27, 08:00]                               |
| Range                                                | 05:00 - 07:45                      | 05:00 - 10:00                                      |
| <i>Median breakfast time (clock time) - diary</i>    |                                    | p=0.15                                             |

|                                                  |                      |                      |
|--------------------------------------------------|----------------------|----------------------|
| Median [Q1, Q3]                                  | 08:00 [07:22, 08:34] | 08:40 [08:02, 09:07] |
| Range                                            | 06:30 - 09:30        | 07:00 - 10:30        |
| <b>Median lunch time (clock time) - diary</b>    | p=0.13               |                      |
| Median [Q1, Q3]                                  | 12:52 [12:34, 13:11] | 13:00 [13:00, 13:15] |
| Range                                            | 09:45 - 13:45        | 12:35 - 13:37        |
| <b>Median dinner time (clock time) - diary</b>   | p=0.02*              |                      |
| Median [Q1, Q3]                                  | 19:00 [18:30, 19:30] | 18:15 [17:45, 18:35] |
| Range                                            | 17:15 - 20:15        | 17:00 - 19:30        |
| <b>Median retiring time (clock time) - diary</b> | p=0.20               |                      |
| Median [Q1, Q3]                                  | 23:00 [22:38, 23:42] | 22:30 [22:17, 22:48] |
| Range                                            | 21:15 - 00:15        | 19:00 - 01:00        |
| <b>Median wake-up time (clock time) - HMM</b>    | p=0.008**            |                      |
| Median [Q1, Q3]                                  | 06:31 [05:30, 07:16] | 07:41 [07:13, 08:25] |
| Range                                            | 04:01 - 07:53        | 05:22 - 10:30        |
| <b>Median sleep onset (clock time) - HMM</b>     | p=0.10^              |                      |
| Median [Q1, Q3]                                  | 22:52 [22:30, 23:28] | 22:16 [20:41, 23:00] |
| Range                                            | 20:16 - 00:30        | 16:50 - 00:00        |
| <b>Salivary cortisol circadian rhythm</b>        | N=13                 | N=7                  |
| <b>Circadian mesor (mol/L)</b>                   | p=0.18               |                      |
| Median [Q1, Q3]                                  | 4.4 [3.3, 5.2]       | 5.6 [4.4, 7.0]       |
| Range                                            | 3.1 - 7.2            | 3.1 - 9.4            |
| <b>Circadian amplitude (mol/L)</b>               | p=0.01*              |                      |
| Median [Q1, Q3]                                  | 3.3 [2.8, 3.9]       | 5.2 [3.9, 6.3]       |
| Range                                            | 1.9 - 5.5            | 3.4 - 6.5            |
| <b>Circadian acrophase (clock time)</b>          | p=0.31               |                      |
| Median [Q1, Q3]                                  | 08:47 [08:13, 09:09] | 07:53 [07:11, 09:11] |
| Range                                            | 05:27 - 11:39        | 06:49 - 10:09        |
| <b>Dim Light Melatonin Onset</b>                 | N=10                 | N=7                  |
| <b>DLMO (clock time)</b>                         | p=0.09^              |                      |
| Median [Q1, Q3]                                  | 20:30 [19:21, 21:12] | 21:44 [20:55, 22:16] |
| Range                                            | 17:22 - 21:33        | 18:23 - 23:32        |

Abbreviations: SR = Spectrum Resampling; HMM = Hidden Markov Model; DLMO = Dim Light Melatonin Onset. Comparisons between controls aged 40 years or more and cancer patients with (I<O)<sub>high</sub> were done with two-tailed Welch's t-tests for continuous variables and Fisher's exact test for categorical variables. The corresponding p-values are shown for each parameter as follows: \*\*\*\*p<0.0001; \*\* 0.001< p ≤0.01; \* 0.01< p ≤0.05; ^ 0.05< p ≤0.1.
